# Supplementary material
Source: Springer Nature journal article supplement (https://www.springermedizin.de/resource/supplementary/12906_2009_247_MOESM2_ESM.pdf/9524354)

### A Median SBP $\pm$ SE

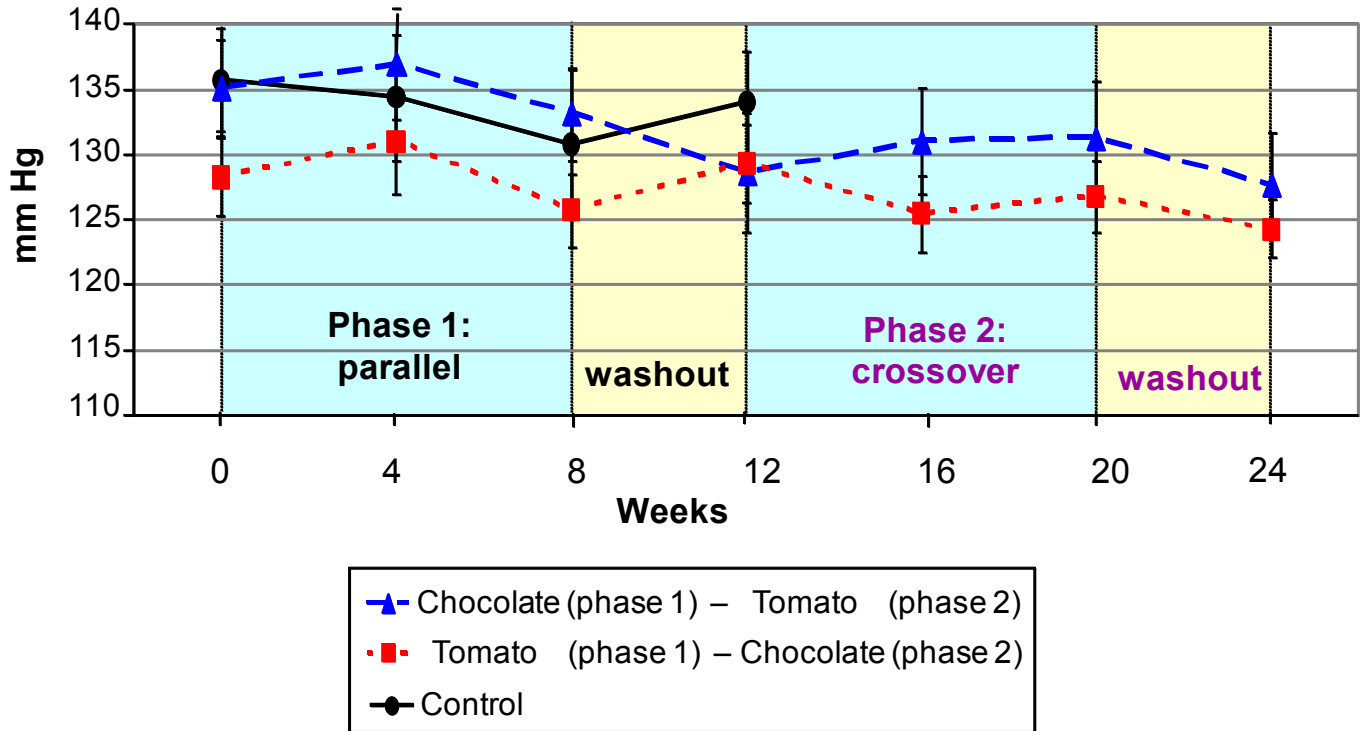

### B Median DBP $\pm$ SE

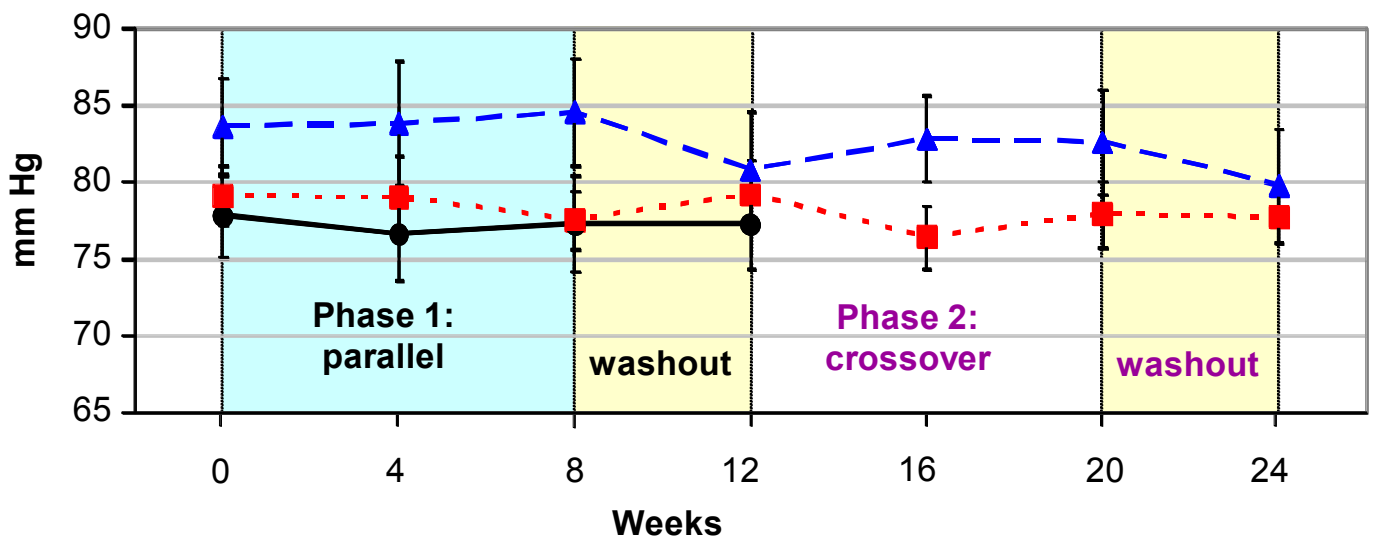

Supplement: MOESM2 [file 9524354]
